# Supplementary material for: A Machine Learning Approach to Retrieving Aerosol Optical Depth Using Solar Radiation Measurements
Source: MDPI journal article supplement (doi:10.3390/rs16071132), 2024-03-23
Supplement: s1 [file s1]

# Supplementary material

## **A Machine Learning Approach to Retrieving Aerosol Optical Depth Using Solar Radiation Measurements**

Stavros-Andreas Logothetis<sup>1</sup>, Vasileios Salamalikis<sup>2</sup> and Andreas Kazantzidis<sup>1\*</sup>

<sup>1</sup>Laboratory of Atmospheric Physics, Physics Department, University of Patras, 26500, Patras, Greece

<sup>2</sup>NILU, P. O. Box 100, Kjeller 2027, Norway

\*corresponding author: [akaza@upatras.gr](mailto:akaza@upatras.gr)



**Table S1:** Information about the BSRN and AERONET stations' names, BSRN stations' acronym, location, train and test period, data availability (at 1-min resolution) and machine learning algorithm with the highest performance.

| BSRN Station              | AERONET Station                    | BSRN ACRO | Location                   | Train period    | Test period     | N      | MLA  |
|---------------------------|------------------------------------|-----------|----------------------------|-----------------|-----------------|--------|------|
| <b>Equatorial (A)</b>     |                                    |           |                            |                 |                 |        |      |
| Darwin                    | Darwin ARM Darwin                  | DAR       | Australia                  | 04/2004–04/2013 | 05/2013–12/2014 | 28461  | RF   |
| <b>Arid (B)</b>           |                                    |           |                            |                 |                 |        |      |
| Boulder                   | Table Mountain                     | BOS       | Colorado, USA              | 02/2009–07/2015 | 08/2015–11/2019 | 59892  | MARS |
| Boulder                   | BSRN BAO Boulder                   | BOU       | Colorado, USA              | 09/2004–05/2014 | 06/2014–06/2016 | 27473  | MARS |
| Desert Rock               | Frenchman Flat                     | DRA       | Nevada, USA                | 12/2006–04/2013 | 05/2013–01/2015 | 22424  | ANN  |
| Gobabeb                   | Gobabeb                            | GOB       | Namib Desert, Namibia      | 11/2014–08/2018 | 09/2018–09/2019 | 147188 | ANN  |
| Petrolina                 | Petrolina SONDA                    | PTR       | Brazil                     | 05/2007–04/2015 | 05/2015–08/2016 | 12387  | MARS |
| Sede Boqer                | SEDE_BOKER                         | SBO       | Israel                     | 01/2004–09/2010 | 10/2010–12/2012 | 53473  | RF   |
| Tamanrasset               | Tamanrasset INM<br>Tamanrasset TMP | TAM       | Algeria                    | 09/2006–09/2014 | 10/2014–02/2018 | 52901  | RF   |
| Xianghe                   | Xianghe                            | XIA       | China                      | 01/2005–07/2014 | 08/2014–10/2015 | 24826  | RF   |
| <b>Warm Temperate (C)</b> |                                    |           |                            |                 |                 |        |      |
| Billings                  | Cart Site                          | BIL       | Oklahoma, USA              | 09/2004–07/2013 | 08/2013–04/2018 | 50509  | MARS |
| Bondville                 | BONDVILLE                          | BON       | Illinois, USA              | 01/2004–10/2016 | 11/2016–12/2019 | 21723  | ANN  |
| Carpentras                | Carpentras                         | CAR       | France                     | 06/2004–03/2016 | 04/2016–11/2018 | 82735  | ANN  |
| Chesapeake Light          | COVE SEAPRISM COVE                 | CLH       | North Atlantic Ocean       | 01/2004–10/2006 | 11/2006–01/2008 | 9303   | ANN  |
| Cener                     | CENER                              | CNR       | Spain, Sarriguren, Navarra | 06/2013–10/2016 | 11/2016–10/2018 | 16218  | ANN  |
| Southern Great Plains     | Cart Site ARM_SGP                  | E13       | Oklahoma, USA              | 01/2004–01/2015 | 02/2015–05/2018 | 55098  | ANN  |
| Fukuoka                   | Fukuoka                            | FUA       | Japan                      | 06/2012–08/2015 | 09/2015–01/2019 | 29379  | ANN  |
| Lindenberg                | MetObs Lindenberg                  | LIN       | Germany                    | 09/2013–07/2017 | 08/2017–06/2018 | 4529   | ANN  |



|                                    |                              |     |                              |                 |                 |       |      |
|------------------------------------|------------------------------|-----|------------------------------|-----------------|-----------------|-------|------|
| Langley<br>Research<br>Center      | NASA LaRC                    | LRC | Hampton,<br>Virginia,<br>USA | 12/2014–11/2018 | 12/2018–12/2019 | 30426 | MARS |
| Observatory<br>of<br>Huancayo      | Huancayo-IGP                 | OHY | Peru                         | 08/2017–07/2018 | 08/2018–03/2019 | 10897 | MARS |
| Palaiseau,<br>SIRTA<br>Observatory | Palaiseau                    | PAL | France                       | 10/2015–09/2018 | 10/2018–10/2019 | 26935 | ANN  |
| São<br>Martinho da<br>Serra        | Sao Martinho<br>SONDA        | SMS | Brazil                       | 11/2008–07/2013 | 08/2013–11/2014 | 6415  | ANN  |
| <b>Snow (D)</b>                    |                              |     |                              |                 |                 |       |      |
| Regina                             | Bratts_Lake                  | REG | Canada                       | 01/2004–06/2010 | 07/2010–12/2011 | 61898 | RF   |
| Sapporo                            | Hokkaido<br>University       | SAP | Japan                        | 10/2015–08/2018 | 09/2018–09/2019 | 23845 | ANN  |
| Sioux Falls                        | Sioux Falls<br>Sioux Falls X | SXF | South<br>Dakota,<br>USA      | 06/2004–03/2016 | 04/2016–08/2018 | 20593 | MARS |
| Toravere                           | Toravere                     | TOR | Estonia                      | 02/2004–03/2016 | 04/2016–07/2019 | 22589 | ANN  |
| <b>Polar (E)</b>                   |                              |     |                              |                 |                 |       |      |
| Barrow                             | Barrow<br>NEON BARR          | BAR | Alaska,<br>USA               | 05/2004–07/2012 | 08/2012–07/2017 | 7839  | ANN  |



**Table S2:** Hyperparameters that are tuned during the training of machine learning algorithms.

| <b>MLA</b>  | <b>Hyperparameters</b>                                            |
|-------------|-------------------------------------------------------------------|
| <b>LGBM</b> | <b>n_estimators</b> = [50, 100, 500, 1000, 1500, 2000]            |
|             | <b>learning_rate</b> = [0.3, 0.2, 0.1, 0.05, 0.01, 0.001, 0.0001] |
|             | <b>max_depth</b> = [2, 5, 10, 12, 15, 20]                         |
|             | <b>num_leaves</b> = [2, 5, 10, 12, 15, 20]                        |
| <b>RF</b>   | <b>n_estimator</b> = [100, 300, 500, 700, 900, 1000, 1500, 2000]  |
|             | <b>max_features</b> = [1, 2, 3]                                   |
|             | <b>max_depth</b> = [None, 10, 15, 20, 25]                         |
|             | <b>min_samples_split</b> = [2, 3, 4, 5, 6]                        |
| <b>MARS</b> | <b>min_samples_leaf</b> = [1, 2, 3, 4, 5, 6]                      |
|             | <b>max_terms</b> = [1, 2, 3]                                      |
|             | <b>max_degree</b> = [1, 2, 3]                                     |
| <b>KNN</b>  | <b>n_neighbors</b> = [neighbors from 1 to 30 per 1]               |
| <b>ANN</b>  | <b>Hidden layer 1</b> = [nodes from 8 to 64 per 4]                |
|             | <b>Hidden layer 2</b> = [nodes from 8 to 32 per 4]                |



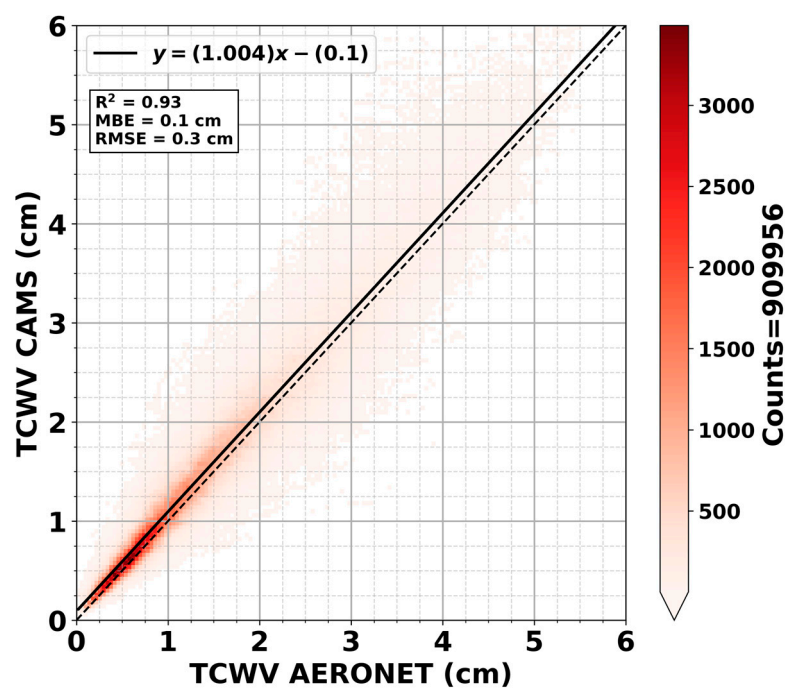

**Figure S1:** Linear correlation between CAMS and AERONET total column water vapor retrievals.



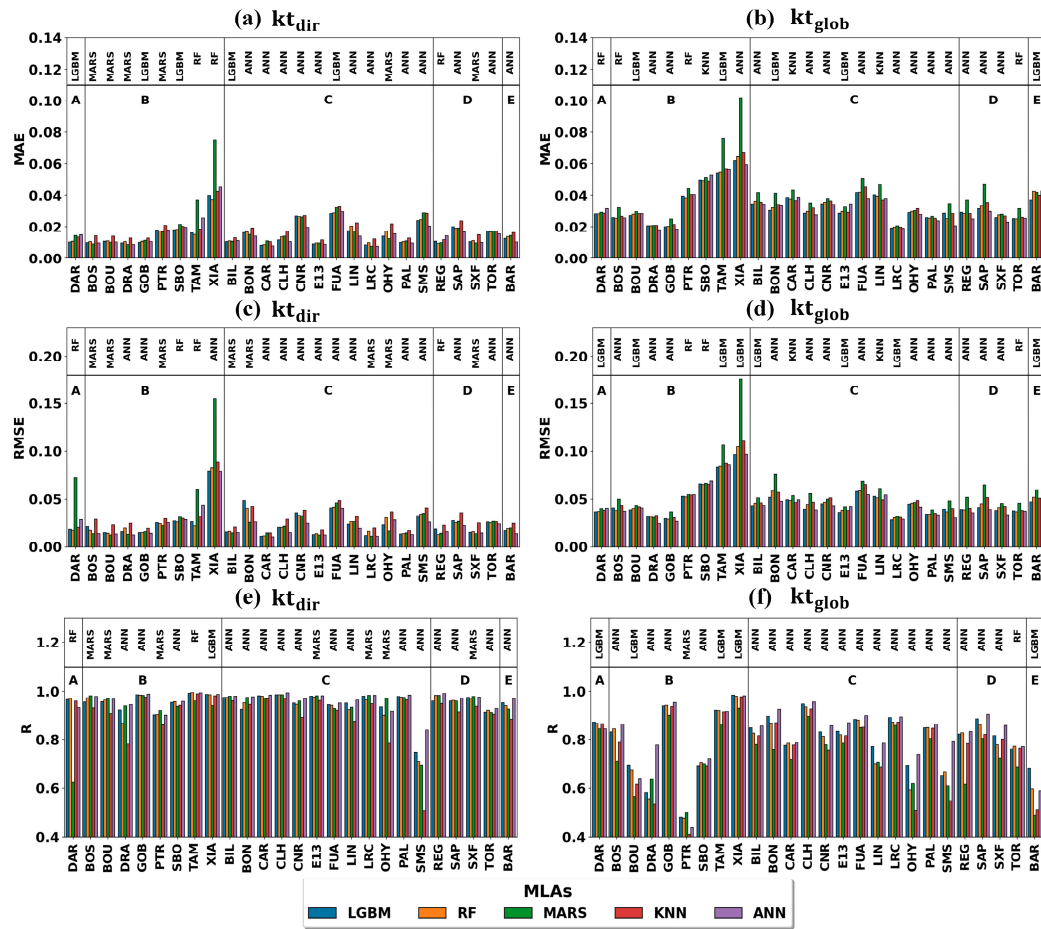

**Figure S2.** Statistical indices (MAE, RMSE and R) for Scenario 1 (a, c, e) and Scenario 2 (b, d, f) for each machine learning algorithm (MLA). The horizontal lines separate the stations based on the KG classes. The MLA with the best performance is added above each station.



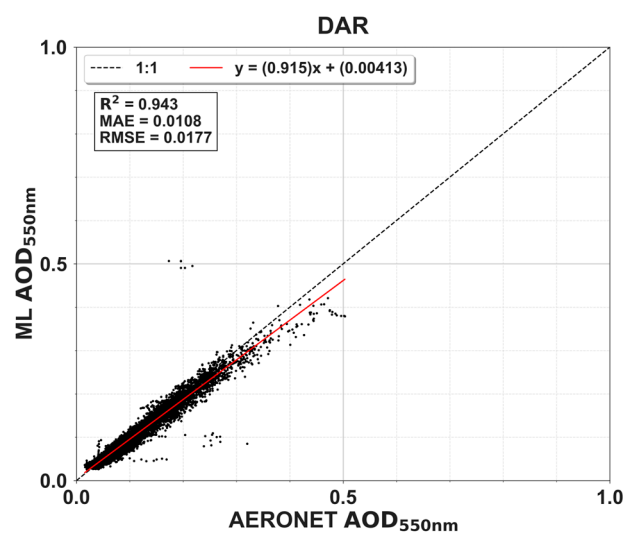

**Figure S3.** Linear correlation between ML-AOD and AERONET AOD for the stations in Equatorial (A) KG climate class.



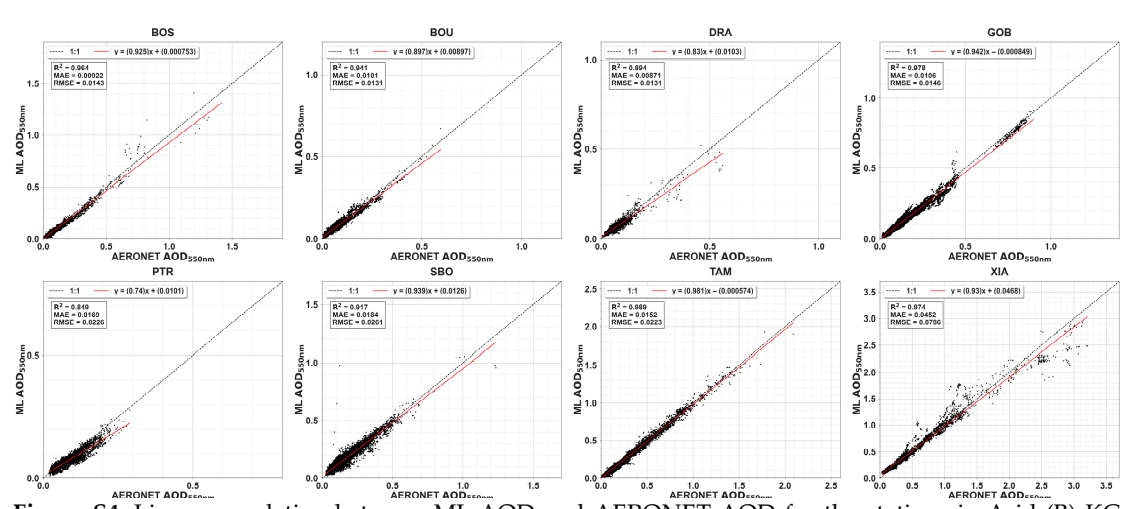

**Figure S4.** Linear correlation between ML-AOD and AERONET AOD for the stations in Arid (B) KG climate class.



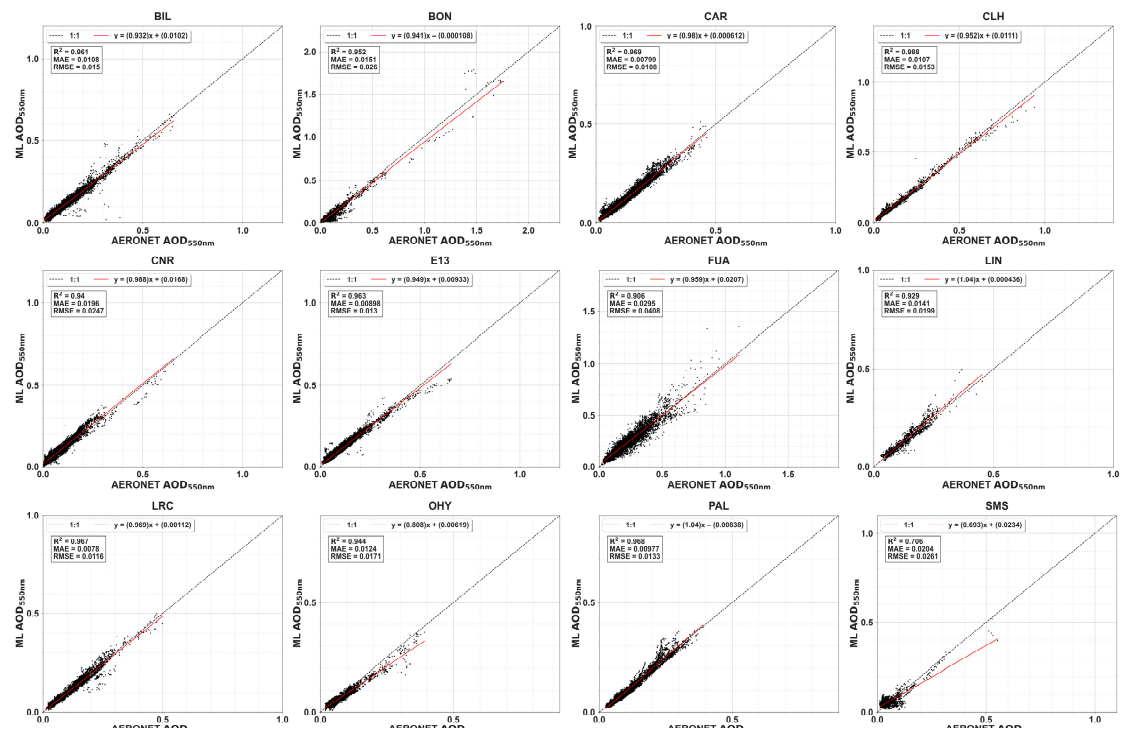

**Figure S5.** Linear correlation between ML-AOD and AERONET AOD for the stations in Warm temperate (C) KG climate class.



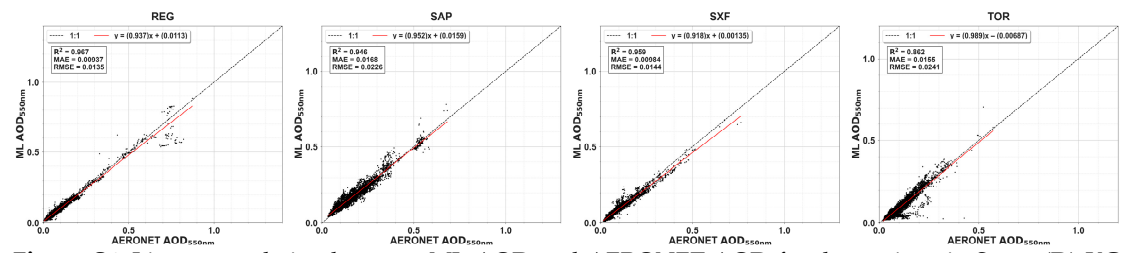

**Figure S6.** Linear correlation between ML-AOD and AERONET AOD for the stations in Snow (D) KG climate class.



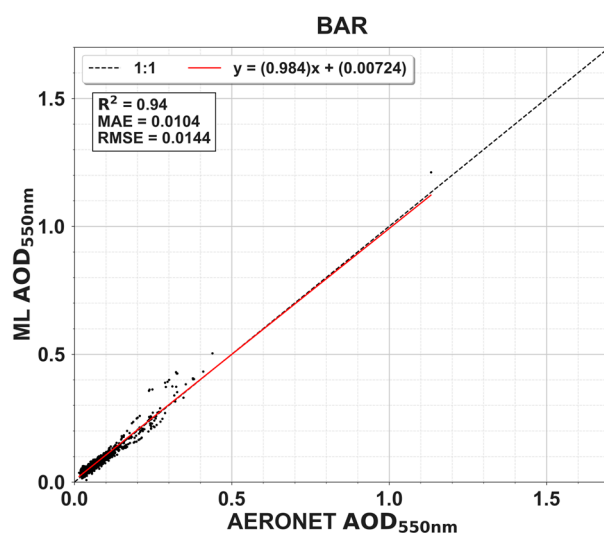

**Figure S7.** Linear correlation between ML-AOD and AERONET AOD for the stations in Polar (E) KG climate class.



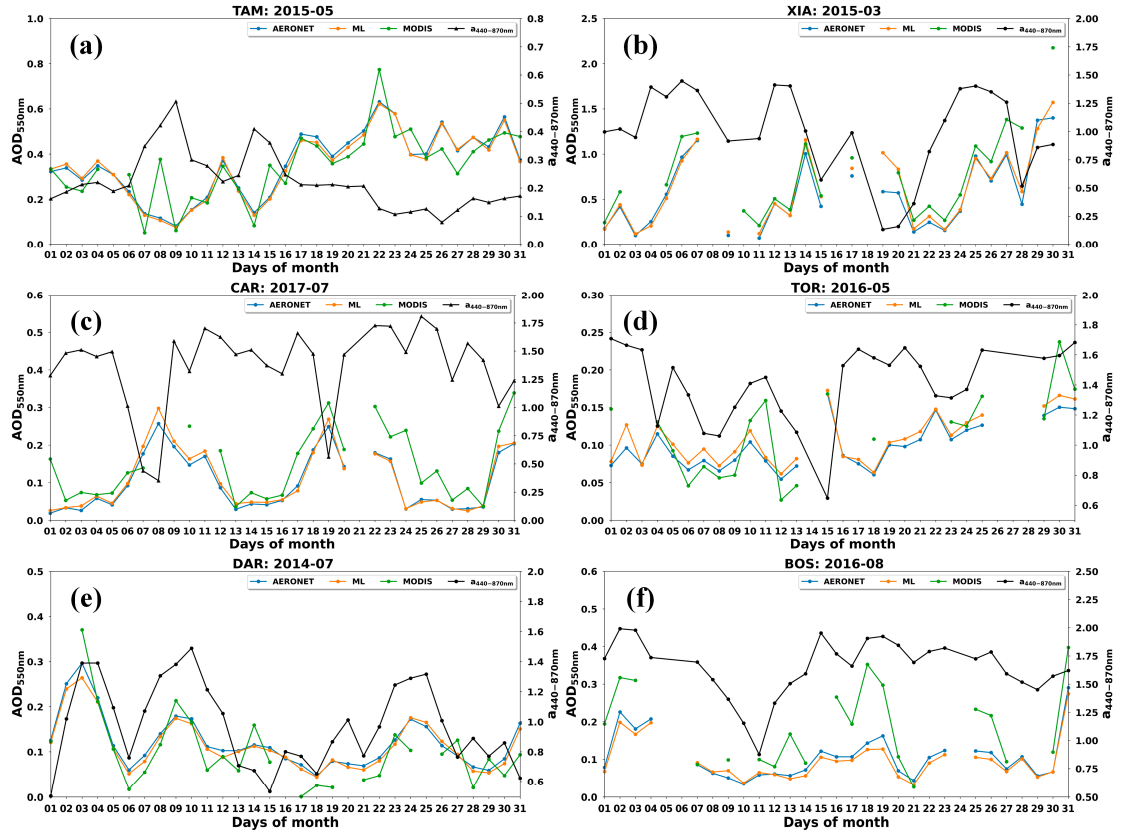

**Figure S8.** AERONET, ML-AOD, and MODIS AOD<sub>550nm</sub> daily variability for specific months at (a) TAM, (b) XIA, (c) CAR, (d) TOR, (e) DAR, and (f) BOS sites. The second y-axis shows the daily variability of A<sub>440-870nm</sub>.
